# Supplementary material
Source: publisher site journal article supplement (https://bdj.pensoft.net/article/download/suppl/3653719/)
Supplement: Supplementary file 1 [file  › doc.kml]

<?xml version="1.0" encoding="UTF-8"?>
<kml xmlns="http://www.opengis.net/kml/2.2" xmlns:gx="http://www.google.com/kml/ext/2.2" xmlns:xsi="http://www.w3.org/2001/XMLSchema-instance"
 xsi:schemaLocation="http://www.opengis.net/kml/2.2 http://schemas.opengis.net/kml/2.2.0/ogckml22.xsd http://www.google.com/kml/ext/2.2 http://code.google.com/apis/kml/schema/kml22gx.xsd">
<Document id="Caulotrupis_parvus">
  <name>Caulotrupis_parvus</name>
  <Snippet></Snippet>
  <Folder id="FeatureLayer0">
    <name>Caulotrupis_parvus</name>
    <Snippet></Snippet>
    <Placemark id="ID_00000">
      <name>Caulotrupis parvus</name>
      <Snippet></Snippet>
      <description><![CDATA[<html xmlns:fo="http://www.w3.org/1999/XSL/Format" xmlns:msxsl="urn:schemas-microsoft-com:xslt">

<head>

<META http-equiv="Content-Type" content="text/html">

<meta http-equiv="content-type" content="text/html; charset=UTF-8">

</head>

<body style="margin:0px 0px 0px 0px;overflow:auto;background:#FFFFFF;">

<table style="font-family:Arial,Verdana,Times;font-size:12px;text-align:left;width:100%;border-collapse:collapse;padding:3px 3px 3px 3px">

<tr style="text-align:center;font-weight:bold;background:#9CBCE2">

<td>Caulotrupis parvus</td>

</tr>

<tr>

<td>

<table style="font-family:Arial,Verdana,Times;font-size:12px;text-align:left;width:100%;border-spacing:0px; padding:3px 3px 3px 3px">

<tr>

<td>FID</td>

<td>0</td>

</tr>

<tr bgcolor="#D4E4F3">

<td>Id</td>

<td>0</td>

</tr>

<tr>

<td>ID_NO</td>

<td>0</td>

</tr>

<tr bgcolor="#D4E4F3">

<td>BINOMIAL</td>

<td>Caulotrupis parvus</td>

</tr>

<tr>

<td>PRESENCE</td>

<td>1</td>

</tr>

<tr bgcolor="#D4E4F3">

<td>ORIGIN</td>

<td>1</td>

</tr>

<tr>

<td>SEASONAL</td>

<td>1</td>

</tr>

<tr bgcolor="#D4E4F3">

<td>COMPILER</td>

<td>Anja Danielczak</td>

</tr>

<tr>

<td>YEAR</td>

<td>2017</td>

</tr>

<tr bgcolor="#D4E4F3">

<td>CITATION</td>

<td>Paulo Borges</td>

</tr>

</table>

</td>

</tr>

</table>

</body>

</html>

]]></description>
      <styleUrl>#PolyStyle00</styleUrl>
      <MultiGeometry>
        <Polygon>
          <extrude>0</extrude>          <altitudeMode>clampToGround</altitudeMode>
          <outerBoundaryIs><LinearRing><coordinates> -25.05241034780561,36.95355417585678,0 -25.05229088059474,36.95353718913815,0 -25.0521673421088,36.95352368673968,0 -25.05204343740828,36.95351406959471,0 -25.0519214536012,36.95350850949507,0 -25.0518040276244,36.95350708464994,0 -25.05169145098011,36.95350975446283,0 -25.05158463775409,36.95351649629281,0 -25.05148417868891,36.95352727141403,0 -25.05139218222108,36.95354172630512,0 -25.05130708220139,36.95355997105912,0 -25.05122912934729,36.95358195157451,0 -25.05115849731164,36.9536076183862,0 -25.05109535787233,36.95363690394411,0 -25.0510397718947,36.95366977420682,0 -25.05101483748825,36.95368753853852,0 -25.05099181862835,36.95370618209891,0 -25.05097072201038,36.9537256994584,0 -25.05095155318345,36.95374608547493,0 -25.05091933988177,36.95378750881883,0 -25.05088926344874,36.95383565249108,0 -25.05086132165225,36.95389051929241,0 -25.05083549749226,36.95395214219283,0 -25.05081186243399,36.95402027092245,0 -25.05079022255357,36.95409538050287,0 -25.05077047692135,36.95417777502164,0 -25.05075214906834,36.95426943201052,0 -25.0507451524586,36.95431456387958,0 -25.05074058492339,36.95436040416551,0 -25.05073844681387,36.95440694935716,0 -25.0507387383052,36.95445419566823,0 -25.05074145939876,36.95450213945129,0 -25.05074660985968,36.95455077615483,0 -25.05075418921905,36.95460010133579,0 -25.05076419673953,36.95465011018601,0 -25.05077663241327,36.95470080140649,0 -25.05079149426722,36.95475216594107,0 -25.05080878066108,36.95480419811381,0 -25.05082848954802,36.95485689175825,0 -25.05085061876767,36.95491024100078,0 -25.05087516522045,36.95496423828232,0 -25.05090212558124,36.95501887628286,0 -25.05093149591433,36.95507414702165,0 -25.05099751331253,36.955186657424,0 -25.05107312596773,36.95530159454658,0 -25.05115827927076,36.95541887523036,0 -25.05125290210652,36.95553840140006,0 -25.05135691109288,36.95566006762584,0 -25.0514702071824,36.95578375787948,0 -25.05159268080806,36.95590935333631,0 -25.05172428229867,36.95603680318896,0 -25.05181500463088,36.9561192143255,0 -25.05191123683893,36.9562005964783,0 -25.05201244118235,36.95628049490095,0 -25.05211805014908,36.95635846152074,0 -25.05222745663825,36.9564340494726,0 -25.05234008202275,36.95650686023279,0 -25.05245532413282,36.95657650466512,0 -25.05257259852382,36.95664262969721,0 -25.05269090261884,36.95670469506835,0 -25.05281011404475,36.95676266126975,0 -25.05292971205767,36.95681627528678,0 -25.05304922173911,36.95686532441164,0 -25.05316813590497,36.95690960372613,0 -25.05328610395469,36.95694898593856,0 -25.05340274411706,36.95698334377343,0 -25.05351772139732,36.95701257873957,0 -25.05364387116862,36.95703952975673,0 -25.05377448821034,36.9570624892976,0 -25.05390901378931,36.95708135901887,0 -25.05404683590477,36.9570960529321,0 -25.05418734315762,36.9571065043571,0 -25.05432982733206,36.9571126591219,0 -25.05447359104688,36.95711448708464,0 -25.05461792077248,36.95711197912606,0 -25.05476201754103,36.95710515288009,0 -25.05490525763125,36.95709404161856,0 -25.05504694656653,36.9570786993075,0 -25.05518642238674,36.95705919769585,0 -25.05532300655297,36.95703563380946,0 -25.05545615339867,36.95700810396743,0 -25.05558530688278,36.95697672330255,0 -25.05570996876613,36.95694161303339,0 -25.05592753501966,36.95687688583663,0 -25.05604390998463,36.95684016853798,0 -25.05615305970066,36.95680193917442,0 -25.05624778492839,36.95676398991876,0 -25.05633678918014,36.95672224570863,0 -25.05641447369803,36.95667863427145,0 -25.05644938906077,36.95665595155588,0 -25.05648176170459,36.95663263401823,0 -25.05651164583564,36.95660864252843,0 -25.0565390802773,36.95658394579802,0 -25.05659047715708,36.95653002139954,0 -25.05663958196795,36.95646873809552,0 -25.05668572597806,36.95640092518303,0 -25.05672807400414,36.95632780515011,0 -25.05676596415089,36.95625041373336,0 -25.05679817222669,36.95617113046601,0 -25.05682380639357,36.95609214723039,0 -25.0568420794204,36.95601588113885,0 -25.05684748400454,36.9559820972496,0 -25.05685074496415,36.95594748430851,0 -25.05685186069754,36.95591205917396,0 -25.05685083058899,36.95587584101418,0 -25.05684765488545,36.95583884752237,0 -25.05684233557763,36.95580110479433,0 -25.05683487617486,36.95576263786084,0 -25.05682528220691,36.95572347532227,0 -25.05681354774632,36.95568360568472,0 -25.05679969206297,36.95564310481267,0 -25.05676567230868,36.95556036539912,0 -25.05672336326917,36.95547560097232,0 -25.05667299126436,36.95538926664981,0 -25.05661347961468,36.95529993086093,0 -25.05654634426469,36.95521022936217,0 -25.05647220326259,36.95512099124518,0 -25.05639195326651,36.95503329827349,0 -25.05630630777019,36.95494798621776,0 -25.05621708898003,36.95486692279746,0 -25.0561260067862,36.95479166432962,0 -25.05603513636633,36.95472392855599,0 -25.05598736421104,36.95469285246204,0 -25.05593601984242,36.9546644109819,0 -25.05588099640877,36.95463854462621,0 -25.05582214953447,36.95461518530644,0 -25.05575938127307,36.95459428685964,0 -25.05569238615014,36.95457574087431,0 -25.0556208725244,36.95455946579452,0 -25.05554439695016,36.95454536017607,0 -25.05547437334177,36.95453490329299,0 -25.05539969588266,36.95452587932125,0 -25.05523272705054,36.95451171677298,0 -25.05506015322823,36.95450286016531,0 -25.05458412160028,36.95448555727548,0 -25.05444227116649,36.95447672844902,0 -25.05431698287694,36.95446533626909,0 -25.05417872242925,36.95444722124337,0 -25.05411470102154,36.95443629437649,0 -25.05405365478855,36.95442405114456,0 -25.05399527673671,36.95441042625463,0 -25.05393947673714,36.95439539470234,0 -25.05388611186484,36.95437891787562,0 -25.05383507577168,36.95436096278768,0 -25.05375920919304,36.95432976099085,0 -25.05368174452261,36.95429240740778,0 -25.05360190669504,36.95424853480702,0 -25.0535182044929,36.95419732693664,0 -25.05344526096,36.95414901056566,0 -25.05336511562135,36.95409280657636,0 -25.05309977563726,36.95389684639138,0 -25.05299966308805,36.9538251839729,0 -25.05289817846091,36.95375740552243,0 -25.05280528522875,36.95370141920305,0 -25.05275316911794,36.95367307247453,0 -25.05270231404401,36.95364777884763,0 -25.0526524034305,36.95362538125911,0 -25.05260322021695,36.9536057828908,0 -25.05255452091299,36.95358889123909,0 -25.05250622151472,36.95357468181811,0 -25.05245819666411,36.95356311787819,0 -25.05241034780561,36.95355417585678,0</coordinates></LinearRing></outerBoundaryIs>
        </Polygon>
        <Polygon>
          <extrude>0</extrude>          <altitudeMode>clampToGround</altitudeMode>
          <outerBoundaryIs><LinearRing><coordinates> -25.0886811877352,36.97726682594725,0 -25.088636644932,36.97731763240609,0 -25.08858785502004,36.97736677293008,0 -25.08853474114152,36.97741432519263,0 -25.0884771997999,36.97746038204575,0 -25.08841515439578,36.97750501064525,0 -25.08834839438443,36.97754836776846,0 -25.08827671468392,36.97759058719294,0 -25.08819981647245,36.97763184531964,0 -25.08811533088267,36.97767328103835,0 -25.08802436808373,36.97771422546246,0 -25.08792612530944,36.97775504307016,0 -25.08781907228589,36.97779637122609,0 -25.08771201314068,36.97783519207352,0 -25.087591541708,36.97787669846689,0 -25.087126053047,36.97802906720929,0 -25.08693273798168,36.97809519189345,0 -25.08683004193384,36.97813265965956,0 -25.08673601014557,36.9781690367152,0 -25.0866487926273,36.97820504020895,0 -25.08656747683309,36.97824104997195,0 -25.0864725473947,36.97828680891089,0 -25.08638499588228,36.97833347842077,0 -25.08630419633668,36.97838139311443,0 -25.08622975857114,36.97843078593433,0 -25.08616128006975,36.97848193609652,0 -25.0860986521829,36.97853493820208,0 -25.08604170029388,36.97858994041778,0 -25.08599030084224,36.97864706263258,0 -25.08592157983551,36.97873084459671,0 -25.08585753063353,36.97881216695039,0 -25.0857977968739,36.97889148290138,0 -25.08574222994016,36.97896899140284,0 -25.08569066040919,36.97904493656061,0 -25.08564310784356,36.97911929818606,0 -25.08559953410098,36.97919213606668,0 -25.08555991997773,36.97926348254231,0 -25.08552416910549,36.97933353199965,0 -25.08549237667051,36.97940212112275,0 -25.08546453810308,36.97946925981982,0 -25.0854406516132,36.97953495248757,0 -25.08542071532131,36.97959920501793,0 -25.08540473046174,36.9796620143144,0 -25.08539269719763,36.97972337976252,0 -25.08538461591032,36.97978329946672,0 -25.08537950838026,36.97985188084671,0 -25.08537810777884,36.97992257204412,0 -25.08538041935156,36.97999511589656,0 -25.08538643397057,36.98006922132468,0 -25.08539613128982,36.9801446095529,0 -25.08540946586123,36.98022090976692,0 -25.08542637550147,36.98029776558396,0 -25.08544677646026,36.98037479582783,0 -25.08547061030546,36.98045174529651,0 -25.08549771877831,36.98052807330065,0 -25.08552795783959,36.98060337427127,0 -25.08556116557939,36.98067724494731,0 -25.08559716012876,36.98074928232461,0 -25.08563575689285,36.9808191183517,0 -25.08567675673707,36.98088639291421,0 -25.08571995777038,36.98095077488398,0 -25.08577563046327,36.98102493292118,0 -25.08583885773577,36.98109999344115,0 -25.08590943329395,36.98117571044087,0 -25.08598704732751,36.98125175078921,0 -25.08607152242527,36.98132791538065,0 -25.0861620883181,36.98140348679519,0 -25.08625801081018,36.9814778498456,0 -25.08635816316173,36.98155012926458,0 -25.086420902456,36.98159032222254,0 -25.08648828922162,36.98162674970842,0 -25.08656041886203,36.98165946355219,0 -25.08663741837974,36.98168852154615,0 -25.08671938032002,36.98171396452812,0 -25.08680655986654,36.98173587718087,0 -25.086899201459,36.98175432155458,0 -25.08699765921308,36.98176936856537,0 -25.08710694336194,36.98178150895473,0 -25.08722379340744,36.98179011818469,0 -25.08734920367121,36.98179527327891,0 -25.0874850852255,36.9817970546728,0 -25.08761934082552,36.98179579774531,0 -25.0877697221129,36.98179176784826,0 -25.08832951670015,36.98176743743057,0 -25.08855505408436,36.9817607044866,0 -25.08867484771074,36.98175968742894,0 -25.0887843706662,36.98176103071403,0 -25.08888585115483,36.98176476332159,0 -25.08898039687373,36.98177092951737,0 -25.08909191080101,36.98178237280774,0 -25.08919466021148,36.98179795313376,0 -25.08928943729129,36.98181779175271,0 -25.08937673852327,36.98184199446192,0 -25.08945707516517,36.98187071760911,0 -25.08953059031985,36.98190402855067,0 -25.08956486371001,36.98192243726341,0 -25.08959750902685,36.98194202972582,0 -25.08962854609325,36.98196281784868,0 -25.08965799178202,36.98198481294948,0 -25.08970188413296,36.98202404882792,0 -25.08974208751456,36.98206961455526,0 -25.08977867571487,36.98212159308017,0 -25.08981173543091,36.98218010699547,0 -25.08984132219985,36.98224523065228,0 -25.08986758386081,36.98231726321396,0 -25.08989063030656,36.98239650201332,0 -25.08991060365464,36.9824834326045,0 -25.08992481358121,36.98256102247036,0 -25.08993716771055,36.98264485664312,0 -25.08994778797247,36.98273574005729,0 -25.08995686897244,36.98283532485792,0 -25.08996917939737,36.98302617623394,0 -25.089990712402,36.9834831290668,0 -25.08999877707988,36.9836004083767,0 -25.09000825525192,36.98370262065443,0 -25.0900215998919,36.98380826964376,0 -25.09003775031069,36.98390197667415,0 -25.0900570046046,36.98398545485529,0 -25.09007956561413,36.98405955749683,0 -25.09009456150578,36.98409928099585,0 -25.09011081638416,36.98413602635183,0 -25.09012836314818,36.98416986773449,0 -25.09014723098255,36.98420086119985,0 -25.0901674548055,36.98422906186767,0 -25.09018905573995,36.98425449707997,0 -25.09021205997036,36.98427719759601,0 -25.09023649148229,36.9842971870037,0 -25.09026241030888,36.98431450648516,0 -25.0902898066024,36.98432914195875,0 -25.09031870265487,36.98434110530072,0 -25.09034911927785,36.9843504050921,0 -25.09038108003759,36.98435704812485,0 -25.09041460206185,36.98436103756265,0 -25.09044970498707,36.98436237572609,0 -25.09048640737751,36.98436106330539,0 -25.09054746201493,36.98435316815163,0 -25.09061936132599,36.98433710918426,0 -25.09068947179502,36.98431732791696,0 -25.09085695307217,36.98426582226374,0 -25.09093642934846,36.98424443047097,0 -25.09100101750261,36.98423097008632,0 -25.09105857963455,36.98422343965363,0 -25.09111919948348,36.98422059079283,0 -25.09118022019169,36.9842223516504,0 -25.09124177687014,36.98422872578887,0 -25.09130404309932,36.98423973092596,0 -25.09136713172514,36.98425537759444,0 -25.09143138924206,36.98427574261597,0 -25.09149712485474,36.98430092276294,0 -25.0915647996071,36.98433109384512,0 -25.09162141246687,36.98435935475534,0 -25.09168016661072,36.98439129997283,0 -25.0917416737021,36.98442725899188,0 -25.0918071142681,36.98446792048357,0 -25.09192935627355,36.98454883919954,0 -25.09223861536466,36.98476196263712,0 -25.0923277511339,36.9848199605309,0 -25.09240876717453,36.98486945921722,0 -25.09249838443188,36.98491965475901,0 -25.09258354495848,36.98496207335826,0 -25.09266573410348,36.98499745169811,0 -25.09274573274243,36.98502611956117,0 -25.09294121299232,36.98508726933241,0 -25.09312797428201,36.98514241947102,0 -25.09330784032857,36.98519210730159,0 -25.09348163877098,36.98523655885184,0 -25.0936503555097,36.98527601418557,0 -25.09381397493323,36.98531045683907,0 -25.0939727809332,36.98533994635903,0 -25.09412694778242,36.98536451477596,0 -25.09427727016715,36.98538426083232,0 -25.09442315011648,36.98539907714979,0 -25.09456466563577,36.9854089715842,0 -25.0947018692069,36.98541394771223,0 -25.09483481935403,36.985414006819,0 -25.09496353067502,36.9854091480337,0 -25.09508802847011,36.98539937037418,0 -25.0952083301522,36.98538467243723,0 -25.09534830537836,36.98536181719777,0 -25.09549051071104,36.98533358706599,0 -25.09563380332665,36.98530020910915,0 -25.09577707419285,36.98526194177666,0 -25.0959191546165,36.98521910207084,0 -25.09605914022777,36.98517196750749,0 -25.096196091174,36.98512085491847,0 -25.09632918097298,36.98506607312562,0 -25.09645677682457,36.98500834891653,0 -25.09657917873652,36.98494760311404,0 -25.09669581349903,36.98488412055505,0 -25.09680620781541,36.98481815925432,0 -25.09690987979859,36.98475001318499,0 -25.09700656013794,36.98467986583512,0 -25.09709595275516,36.98460793234101,0 -25.09717782302797,36.98453440187907,0 -25.09723066333529,36.9844823523439,0 -25.09728258780242,36.98442765474115,0 -25.09733347106005,36.98437044105044,0 -25.09738317911695,36.98431086184697,0 -25.09743158816341,36.98424906403996,0 -25.09747854310752,36.98418524408699,0 -25.0975239013138,36.9841195957715,0 -25.09756751592247,36.98405233155644,0 -25.09760930903111,36.98398356092685,0 -25.09764906164358,36.98391363308262,0 -25.09768663246628,36.98384279652066,0 -25.09772188375244,36.98377131088216,0 -25.09775468665832,36.9836994370276,0 -25.09778491648648,36.98362744770557,0 -25.09781245993587,36.98355561276251,0 -25.09783721454821,36.9834841994231,0 -25.09785406695139,36.98342954938981,0 -25.09786930171941,36.98337327350082,0 -25.09788293076977,36.98331532790259,0 -25.09789496731615,36.98325565656793,0 -25.09790542085576,36.98319421779636,0 -25.09791431012618,36.98313090757095,0 -25.09792745146659,36.98299825345837,0 -25.09793444880471,36.98285849653544,0 -25.09793561233308,36.98270792320064,0 -25.09793101348716,36.98254384507496,0 -25.09792033889162,36.98235471423917,0 -25.09791439548727,36.98228985765084,0 -25.09790523809893,36.98222421940531,0 -25.0978928521304,36.9821576938713,0 -25.09787721304198,36.98209014865115,0 -25.09785830210108,36.98202148733259,0 -25.09783605592675,36.98195146717401,0 -25.09781040492107,36.98187986783785,0 -25.09778123974474,36.98180638333003,0 -25.09774795160966,36.98172961873303,0 -25.09771065966352,36.98164997348735,0 -25.09766903394176,36.98156673763008,0 -25.09762242262105,36.98147860521376,0 -25.09752055638735,36.98129773341323,0 -25.09730720489215,36.98093706045935,0 -25.09721956708366,36.98078467996447,0 -25.09713291443312,36.9806241750931,0 -25.09709574008388,36.9805502771287,0 -25.09706201325618,36.98047933548497,0 -25.09702410679687,36.98039351438842,0 -25.09699084705624,36.98031063531136,0 -25.0969619983828,36.98023010936781,0 -25.09693742314986,36.98015154945945,0 -25.09691699409338,36.98007452403927,0 -25.09690068422886,36.97999890103945,0 -25.09688844862624,36.97992447113229,0 -25.09688026119728,36.97985107387291,0 -25.09687726312074,36.9798017723253,0 -25.09687640331737,36.97974990478296,0 -25.09687767033121,36.97969494184343,0 -25.09688108700699,36.97963583678114,0 -25.09689165207037,36.97952492858236,0 -25.09692435180224,36.97925261654449,0 -25.09693087540622,36.97917811078094,0 -25.09693442851478,36.97911139455381,0 -25.09693501095022,36.979040041094,0 -25.09693177949879,36.97897377245794,0 -25.09692467558023,36.9789114343062,0 -25.09691362615049,36.97885242637237,0 -25.09689768311376,36.97878989224289,0 -25.0968780328803,36.97872647756446,0 -25.09685465553665,36.9786621177116,0 -25.09682752096964,36.97859672954053,0 -25.09679660818886,36.97853025550474,0 -25.09676184529125,36.97846253497029,0 -25.09672315841727,36.97839342341025,0 -25.09668043319693,36.97832271609569,0 -25.09663500239351,36.97825238950995,0 -25.09658541685322,36.97817999378729,0 -25.09653139312397,36.9781051129152,0 -25.09647240344998,36.97802701424119,0 -25.09633981107815,36.97786114204842,0 -25.09615940120896,36.97764704422692,0 -25.09606269137391,36.97753810866692,0 -25.0959593140106,36.97743008362735,0 -25.09584928910659,36.9773229900125,0 -25.09573264016941,36.97721685071878,0 -25.09560938954844,36.97711168640755,0 -25.09547957119083,36.97700752635052,0 -25.09534321893479,36.97690439772077,0 -25.09520037270597,36.97680233073495,0 -25.09505100746122,36.97670131140047,0 -25.09489523874485,36.9766014215928,0 -25.09473312426258,36.97650269835008,0 -25.09456473304158,36.97640518373563,0 -25.09439012574537,36.97630891356015,0 -25.09420940919379,36.97621394736936,0 -25.09402268571074,36.97612033899058,0 -25.09383008096879,36.97602815147148,0 -25.09341288764344,36.97583334416424,0 -25.09326998344928,36.9757687827038,0 -25.09313990117828,36.97571196154377,0 -25.09300979191365,36.97565749484011,0 -25.09288670276345,36.97560858533504,0 -25.09276905590112,36.97556460725351,0 -25.0926560217673,36.97552525278871,0 -25.09254149441911,36.97548863065134,0 -25.09243085036794,36.97545670770533,0 -25.09232369655011,36.97542937087658,0 -25.09221976595252,36.97540655253736,0 -25.09211876477018,36.97538819219512,0 -25.09202059837637,36.97537427684956,0 -25.09192512324822,36.97536478627844,0 -25.09183223072031,36.9753597098418,0 -25.09174883236553,36.97535844642257,0 -25.09166331865085,36.97535981563734,0 -25.0915758584814,36.97536381481753,0 -25.09148663596813,36.97537043558027,0 -25.09139583118427,36.97537966510938,0 -25.09130366345342,36.9753914816509,0 -25.0912103475584,36.97540585769388,0 -25.09111611069829,36.97542275826452,0 -25.09102110988419,36.97544215805635,0 -25.09092566334939,36.97546399491963,0 -25.09083001803703,36.97548821236727,0 -25.09073442607534,36.97551474657459,0 -25.09063913933106,36.97554352768207,0 -25.09054441296452,36.97557447867705,0 -25.09045049899105,36.9756075172074,0 -25.09035764503124,36.97564255615763,0 -25.09026648392092,36.9756793412864,0 -25.0901768462063,36.9757179253414,0 -25.09008895657777,36.9757582115813,0 -25.09000302771556,36.97580010249766,0 -25.08991927410804,36.97584349301978,0 -25.08983787493192,36.97588828980419,0 -25.08975901067457,36.97593439348607,0 -25.08968284650544,36.97598170747212,0 -25.08960963217136,36.97603007088824,0 -25.08953940521591,36.97607945298544,0 -25.08947229546947,36.97612976242655,0 -25.08940841829448,36.97618091268348,0 -25.08934788840312,36.97623281111786,0 -25.08929078952248,36.97628538511603,0 -25.08923720649426,36.97633855651227,0 -25.08918721262916,36.97639225250657,0 -25.08915300952115,36.97643291682888,0 -25.08911985983821,36.97647716753377,0 -25.08908748637562,36.97652537065291,0 -25.08905542756575,36.97657821116218,0 -25.089024302759,36.97663437214183,0 -25.08899171156844,36.97669790479478,0 -25.08886947793885,36.97695602003866,0 -25.0888137732098,36.97706518490663,0 -25.08878104239992,36.97712283006842,0 -25.08874841620482,36.97717505316544,0 -25.08871524822339,36.97722288543579,0 -25.0886811877352,36.97726682594725,0</coordinates></LinearRing></outerBoundaryIs>
        </Polygon>
      </MultiGeometry>
    </Placemark>
  </Folder>
  <Style id="PolyStyle00">
    <LabelStyle>
      <color>00000000</color>
      <scale>0.000000</scale>
    </LabelStyle>
    <LineStyle>
      <color>ff00ffff</color>
      <width>1.500000</width>
    </LineStyle>
    <PolyStyle>
      <color>00f0f0f0</color>
      <outline>1</outline>
    </PolyStyle>
  </Style>
</Document>
</kml>
